# Supplementary material for: Synthesis of Poly(methacrylic acid)-block-Polystyrene Diblock Copolymers at High Solid Contents via RAFT Emulsion Polymerization
Source: MDPI journal article supplement (doi:10.3390/polym13213675), 2021-10-25
Supplement: s1 [file s1]

## Article

# Synthesis of Poly(methacrylic acid)-*block*-Polystyrene Diblock Copolymers at High Solid Contents via RAFT Emulsion Polymerization

Iklima Oral <sup>1</sup>, Larissa Grossmann <sup>1</sup>, Elena Fedorenko <sup>1</sup>, Jana Struck <sup>1</sup> and Volker Abetz <sup>1,2,\*</sup>

<sup>1</sup> Institute of Physical Chemistry, Universität Hamburg, Grindelallee 117, 20146 Hamburg, Germany; iklima.oral@chemie.uni-hamburg.de (I.O.); larissa.grossmann@studium.uni-hamburg.de (L.G.); elena.fedorenko@chemie.uni-hamburg.de (E.F.); jana.struck@chemie.uni-hamburg.de (J.S.)

<sup>2</sup> Helmholtz-Zentrum Hereon, Institute of Membrane Research, Max-Planck-Straße 1, 21502 Geesthacht, Germany

\* Correspondence: volker.abetz@hereon.de; Tel.: +49-40-42838-3460

## Supplementary Materials

**Citation:** Oral, I.; Grossmann, L.; Fedorenko, E.; Struck, J.; Abetz, V. Synthesis of Poly(methacrylic acid)-*block*-Polystyrene Diblock Copolymers at High Solid Contents via RAFT Emulsion Polymerization. *Polymers* **2021**, *13*, 3675. <https://doi.org/10.3390/polym13213675>

Academic Editor: Leonard Ionut Atanase

Received: 3 October 2021

Accepted: 15 October 2021

Published: 25 October 2021

**Publisher's Note:** MDPI stays neutral with regard to jurisdictional claims in published maps and institutional affiliations.

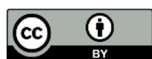

**Copyright:** © 2021 by the authors. Submitted for possible open access publication under the terms and conditions of the Creative Commons Attribution (CC BY) license (<https://creativecommons.org/licenses/by/4.0/>).

**Table S1.** Kinetic Data of the Polymerization of PMAA at 70 °C and a molar ratio of [CTA]/[ACVA] = 10 and [MAA]/[CTA] = 120.  $M_{n,theo}$  represents the theoretical number-average molecular weight of PMAA and  $M_{n,exp}$  the experimental theoretical number-average molecular weight measured by SEC. The dispersity  $M_w/M_n$  was determined by aqueous SEC using PEO calibration. CTA1 represents the RAFT CTA with a propyl terminus as a Z-group and CTA2 the butyl terminus.

| CTA  | Solvent     | Time [min] | Conversion [%] | $M_{n,theo}$ [kDa] | $M_{n,exp}$ [kDa] | $M_w/M_n$ |
|------|-------------|------------|----------------|--------------------|-------------------|-----------|
| CTA1 | water       | 0          | 0              | 0                  | -                 | -         |
| CTA1 | water       | 60         | 33.9           | 3.59               | 32.1              | 1.10      |
| CTA1 | water       | 120        | 75.8           | 8.04               | 37.2              | 1.08      |
| CTA1 | water       | 180        | 89.8           | 9.52               | 39.7              | 1.07      |
| CTA1 | water       | 240        | 97.3           | 10.3               | 40.2              | 1.12      |
| CTA1 | water       | 300        | 98.5           | 10.4               | 41.2              | 1.06      |
| CTA1 | water       | 360        | 99.1           | 10.5               | 42.0              | 1.07      |
| CTA1 | ethanol     | 0          | 0              | 0                  | -                 | -         |
| CTA1 | ethanol     | 60         | 0              | 0                  | -                 | -         |
| CTA1 | ethanol     | 120        | 23.2           | 2.46               | 17.9              | 1.10      |
| CTA1 | ethanol     | 180        | 36.3           | 4.46               | 21.2              | 1.10      |
| CTA1 | ethanol     | 240        | 48.3           | 5.93               | 24.6              | 1.09      |
| CTA1 | ethanol     | 300        | 59.4           | 7.30               | 27.2              | 1.09      |
| CTA1 | ethanol     | 360        | 69.1           | 8.50               | 31.9              | 1.08      |
| CTA1 | 1,4-dioxane | 0          | 0              | 0                  | -                 | -         |
| CTA1 | 1,4-dioxane | 60         | 30.5           | 3.74               | -                 | -         |
| CTA1 | 1,4-dioxane | 120        | 54.6           | 6.71               | 28.8              | 1.14      |
| CTA1 | 1,4-dioxane | 180        | 64.0           | 7.87               | 34.2              | 1.11      |
| CTA1 | 1,4-dioxane | 240        | 75.2           | 9.24               | 35.9              | 1.10      |
| CTA1 | 1,4-dioxane | 300        | 78.8           | 9.69               | 36.8              | 1.10      |
| CTA2 | water       | 0          | 0              | 0                  | -                 | -         |
| CTA2 | water       | 60         | 7.00           | 0.743              | -                 | -         |
| CTA2 | water       | 120        | 51.5           | 5.47               | 51.3              | 1.18      |
| CTA2 | water       | 180        | 73.3           | 7.78               | 59.2              | 1.18      |
| CTA2 | water       | 240        | 90.1           | 9.56               | 63.4              | 1.19      |
| CTA2 | water       | 300        | 95.2           | 10.1               | 66.6              | 1.20      |
| CTA2 | water       | 360        | 97.8           | 10.4               | 66.9              | 1.20      |
| CTA2 | ethanol     | 0          | 0              | 0                  | -                 | -         |
| CTA2 | ethanol     | 60         | 40.0           | 4.24               | 20.7              | 1.17      |
| CTA2 | ethanol     | 120        | 50.6           | 5.37               | 30.0              | 1.19      |
| CTA2 | ethanol     | 180        | 54.7           | 5.81               | 36.8              | 1.19      |
| CTA2 | ethanol     | 240        | 65.4           | 6.95               | 43.9              | 1.17      |
| CTA2 | ethanol     | 300        | 65.9           | 7.00               | 46.9              | 1.18      |
| CTA2 | ethanol     | 360        | 66.7           | 7.08               | 51.4              | 1.18      |
| CTA2 | 1,4-dioxane | 0          | 0              | 0                  | -                 | -         |
| CTA2 | 1,4-dioxane | 60         | 22.8           | 2.42               | 39.4              | 1.13      |
| CTA2 | 1,4-dioxane | 120        | 36.9           | 3.92               | 50.8              | 1.06      |
| CTA2 | 1,4-dioxane | 180        | 55.1           | 5.85               | 53.2              | 1.12      |
| CTA2 | 1,4-dioxane | 240        | 58.9           | 6.26               | 54.9              | 1.12      |
| CTA2 | 1,4-dioxane | 300        | 68.5           | 7.27               | 55.8              | 1.13      |
| CTA2 | 1,4-dioxane | 360        | 72.6           | 7.71               | 58.5              | 1.13      |

**Table S2.** Kinetic Data of the Polymerization of PMAA with CTA3 with a molar ratio of  $[MAA]/[CTA3] = 120$ .  $M_{n,theo}$  represents the theoretical number-average molecular weight of PMAA and  $M_{n,exp}$  the experimental theoretical number-average molecular weight measured by SEC. The dispersity  $M_w/M_n$  was determined by aqueous SEC using PEO calibration. CTA3 represents the RAFT CTA with a dodecyl- terminus as a Z-group.

| [CTA]/<br>[ACVA] | Solvent     | Time<br>[min] | Temperature<br>[°C] | Conversion<br>[%] | $M_{n,theo}$<br>[kDa] | $M_{n,exp}$<br>[kDa] | $M_w/M_n$ |
|------------------|-------------|---------------|---------------------|-------------------|-----------------------|----------------------|-----------|
| 10               | 1,4-dioxane | 0             | 70                  | 0                 | 0                     | -                    | -         |
| 10               | 1,4-dioxane | 60            | 70                  | 8.00              | 0.968                 | 10.6                 | 1.73      |
| 10               | 1,4-dioxane | 120           | 70                  | 12.5              | 1.35                  | 11.0                 | 1.72      |
| 10               | 1,4-dioxane | 180           | 70                  | 17.6              | 1.87                  | 12.3                 | 1.67      |
| 10               | 1,4-dioxane | 240           | 70                  | 23.2              | 2.49                  | 13.2                 | 1.66      |
| 10               | 1,4-dioxane | 300           | 70                  | 27.5              | 2.95                  | 14.4                 | 1.59      |
| 10               | 1,4-dioxane | 1170          | 70                  | 75.1              | 8.06                  | 19.3                 | 1.51      |
| 10               | ethanol     | 0             | 70                  | 0                 | 0                     | -                    | -         |
| 10               | ethanol     | 60            | 70                  | 3.80              | 0.410                 | 4.30                 | 1.74      |
| 10               | ethanol     | 120           | 70                  | 2.70              | 0.295                 | 4.70                 | 1.78      |
| 10               | ethanol     | 180           | 70                  | 5.20              | 0.557                 | 4.80                 | 1.78      |
| 10               | ethanol     | 240           | 70                  | 3.70              | 0.393                 | 5.10                 | 1.78      |
| 10               | ethanol     | 300           | 70                  | 7.20              | 0.770                 | 5.30                 | 1.78      |
| 10               | ethanol     | 1170          | 70                  | 45.8              | 4.91                  | 18.3                 | 1.27      |
| 10               | 1-propanol  | 0             | 70                  | 0                 | 0                     | -                    | -         |
| 10               | 1-propanol  | 60            | 70                  | 0                 | 0                     | -                    | -         |
| 10               | 1-propanol  | 120           | 70                  | 0                 | 0                     | -                    | -         |
| 10               | 1-propanol  | 180           | 70                  | 0                 | 0                     | -                    | -         |
| 10               | 1-propanol  | 240           | 70                  | 0                 | 0                     | -                    | -         |
| 10               | 1-propanol  | 300           | 70                  | 0                 | 0                     | -                    | -         |
| 10               | 1,4-dioxane | 0             | 80                  | 0                 | 0                     | -                    | -         |
| 10               | 1,4-dioxane | 60            | 80                  | 19.5              | 2.10                  | 11.6                 | 1.70      |
| 10               | 1,4-dioxane | 120           | 80                  | 29.6              | 3.17                  | 14.9                 | 1.59      |
| 10               | 1,4-dioxane | 180           | 80                  | 32.3              | 3.47                  | 17.0                 | 1.48      |
| 10               | 1,4-dioxane | 240           | 80                  | 40.7              | 4.37                  | 19.5                 | 1.40      |
| 10               | 1,4-dioxane | 300           | 80                  | 41.8              | 4.49                  | 19.4                 | 1.43      |
| 10               | 1,4-dioxane | 360           | 80                  | 43.5              | 4.66                  | 19.6                 | 1.43      |
| 10               | ethanol     | 0             | 80                  | 0                 | 0                     | -                    | -         |
| 10               | ethanol     | 60            | 80                  | 9.20              | 0.990                 | 5.50                 | 1.73      |
| 10               | ethanol     | 120           | 80                  | 11.4              | 1.23                  | 6.90                 | 1.64      |
| 10               | ethanol     | 180           | 80                  | 11.4              | 1.23                  | 7.10                 | 1.65      |
| 10               | ethanol     | 240           | 80                  | 9.86              | 1.06                  | 7.30                 | 1.65      |
| 10               | ethanol     | 300           | 80                  | 13.9              | 1.49                  | 7.60                 | 1.64      |
| 10               | ethanol     | 360           | 80                  | 12.5              | 1.34                  | 7.70                 | 1.63      |
| 10               | 1-propanol  | 0             | 80                  | 0                 | 0                     | -                    | -         |
| 10               | 1-propanol  | 60            | 80                  | 17.6              | 1.89                  | 15.7                 | 1.15      |
| 10               | 1-propanol  | 120           | 80                  | 29.5              | 3.16                  | 19.2                 | 1.12      |
| 10               | 1-propanol  | 180           | 80                  | 37.7              | 4.05                  | 21.5                 | 1.11      |
| 10               | 1-propanol  | 240           | 80                  | 42.3              | 4.54                  | 22.7                 | 1.11      |
| 10               | 1-propanol  | 300           | 80                  | 42.9              | 4.61                  | 23.1                 | 1.11      |
| 10               | 1-propanol  | 360           | 80                  | 42.0              | 4.51                  | 23.1                 | 1.16      |
| 5                | 1,4-dioxane | 0             | 80                  | 0                 | 0                     | -                    | -         |
| 5                | 1,4-dioxane | 60            | 80                  | 32.4              | 3.48                  | 16.8                 | 1.53      |
| 5                | 1,4-dioxane | 120           | 80                  | 49.1              | 5.27                  | 21.3                 | 1.41      |

| [CTA]/<br>[ACVA] | Solvent     | Time<br>[min] | Temperature<br>[°C] | Conversion<br>[%] | $M_{n,theo}$<br>[kDa] | $M_{n,exp}$<br>[kDa] | $M_w/M_n$ |
|------------------|-------------|---------------|---------------------|-------------------|-----------------------|----------------------|-----------|
| 5                | 1,4-dioxane | 180           | 80                  | 65.1              | 6.99                  | 26.4                 | 1.34      |
| 5                | 1,4-dioxane | 240           | 80                  | 80.1              | 8.59                  | 29.9                 | 1.27      |
| 5                | ethanol     | 0             | 80                  | 0                 | 0                     | -                    | -         |
| 5                | ethanol     | 60            | 80                  | 23.2              | 2.49                  | 8.70                 | 1.55      |
| 5                | ethanol     | 120           | 80                  | 40.3              | 4.32                  | 14.3                 | 1.38      |
| 5                | ethanol     | 180           | 80                  | 53.0              | 5.69                  | 18.7                 | 1.29      |
| 5                | ethanol     | 240           | 80                  | 60.5              | 6.49                  | 22.1                 | 1.24      |
| 5                | ethanol     | 300           | 80                  | 63.5              | 6.81                  | 23.8                 | 1.21      |
| 5                | ethanol     | 360           | 80                  | 64.4              | 6.91                  | 24.9                 | 1.21      |
| 5                | 1-propanol  | 0             | 80                  | 0                 | 0                     | -                    | -         |
| 5                | 1-propanol  | 60            | 80                  | 24.6              | 2.64                  | 17.9                 | 1.13      |
| 5                | 1-propanol  | 120           | 80                  | 56.0              | 6.01                  | 26.1                 | 1.13      |
| 5                | 1-propanol  | 180           | 80                  | 69.7              | 7.48                  | 28.7                 | 1.09      |
| 5                | 1-propanol  | 240           | 80                  | 75.6              | 8.11                  | 30.4                 | 1.09      |
| 5                | 1-propanol  | 300           | 80                  | 77.7              | 8.34                  | 30.4                 | 1.09      |
| 5                | 1-propanol  | 360           | 80                  | 79.0              | 8.47                  | 30.6                 | 1.09      |

**Table S3.** Kinetic Data of the Polymerization of PMAA<sub>5</sub>-*b*-PS<sub>95</sub><sup>54</sup> with CTA1 at 80 °C in water and a targeted styrene DP of 502 with a [CTA1]/[ACVA] molar ratio of 5.  $r_{TEM}$  represents the number-average radius obtained by TEM.  $M_{n,theo}$  represents the theoretical number-average molecular weight of PMAA-*b*-PS and  $M_{n,theo}^*$  the theoretical number-average molecular weight of PMMA-*b*-PS. The dispersity  $M_w/M_n$  was determined by SEC THF using PS calibration.

| Time [min] | Conversion<br>[%] | $r_{TEM}$ [nm] | $M_{n,theo}$ [kDa] | $M_{n,theo}^*$<br>[kDa] | $M_{n,exp}$ [kDa] | $M_w/M_n$ |
|------------|-------------------|----------------|--------------------|-------------------------|-------------------|-----------|
| 35         | 3.1               | -              | 4.48               | 4.90                    | -                 | -         |
| 40         | 16                | 15 ± 2         | 11.1               | 11.5                    | 12.5              | 1.13      |
| 45         | 20                | 18 ± 2         | 13.5               | 14.0                    | 25.5              | 1.26      |
| 50         | 56                | 25 ± 2         | 31.9               | 32.3                    | 43.2              | 1.30      |
| 55         | 74                | 24 ± 3         | 42.0               | 42.0                    | 56.2              | 1.30      |
| 60         | 85                | 27 ± 3         | 47.4               | 47.8                    | 64.2              | 1.27      |
| 120        | 99                | 29 ± 3         | 54.4               | 54.8                    | 69.1              | 1.33      |

**Table S4.** Kinetic Data of the Polymerization of PMAA<sub>10</sub>-*b*-PS<sub>90</sub><sup>45</sup> with CTA1 at 80 °C in water and a targeted MAA DP of 50 and a styrene DP of 400 with a [CTA1]/[ACVA] molar ratio of 5 at 20 wt%.  $r_{TEM}$  represents the number-average radius obtained by TEM and  $r_{DLS}$  by DLS.  $M_{n,theo}$  represents the theoretical number-average molecular weight of PMAA-*b*-PS and  $M_{n,theo}^*$  the theoretical number-average molecular weight of PMMA-*b*-PS. The dispersity  $M_w/M_n$  was determined by SEC THF using PS calibration after methylation.

| Time<br>[min] | Conversion<br>[%] | $r_{DLS}$ [nm] | <i>PDI</i>  | $r_{TEM}$<br>[nm] | $M_{n,theo}$<br>[kDa] | $M_{n,theo}^*$<br>[kDa] | $M_{n,exp}$<br>[kDa] | $M_w/M_n$ |
|---------------|-------------------|----------------|-------------|-------------------|-----------------------|-------------------------|----------------------|-----------|
| 60            | 48                | 24 ± 1         | 0.3 ± 0.2   | -                 | 22.3                  | 22.7                    | -                    | -         |
| 70            | 56                | 28.88 ± 0.06   | 0.09 ± 0.02 | -                 | 25.8                  | 26.2                    | 30.0                 | 1.17      |
| 80            | 78                | 31.79 ± 0.06   | 0.08 ± 0.02 | -                 | 36.3                  | 36.3                    | 53.8                 | 1.28      |
| 90            | 93                | 31.9 ± 0.2     | 0.07 ± 0.02 | -                 | 43.2                  | 43.2                    | 66.7                 | 1.28      |
| 120           | 97                | 32.0 ± 0.5     | 0.04 ± 0.02 | 24 ± 3            | 45.0                  | 44.9                    | 69.5                 | 1.26      |

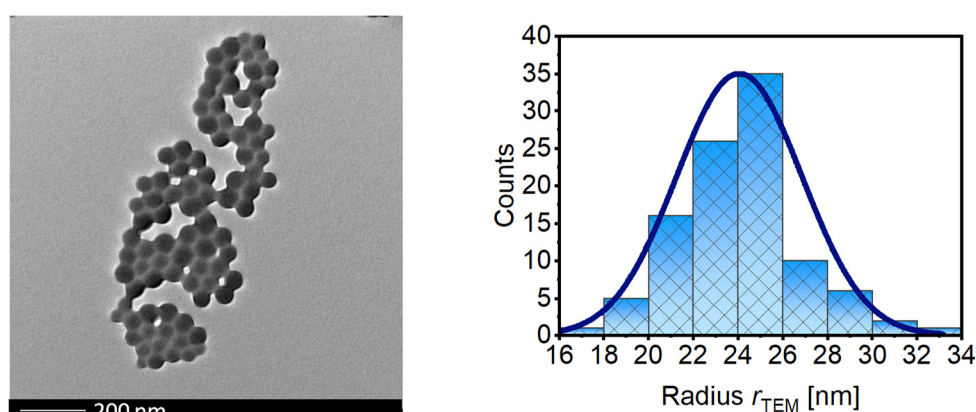

**Figure S1.** TEM image (left) and histogram (right) of the number-average radius of the PMAA<sub>10</sub>-b-PS<sub>90</sub><sup>45</sup> with CTA1 copolymer and 20 wt% after 120 minutes reaction time.

**Table S5.** Kinetic Data of the Polymerization of PMAA<sub>10</sub>-b-PS<sub>90</sub><sup>45</sup> with CTA1 at 80 °C in water and a targeted MAA DP of 50 and a styrene DP of 400 with a [CTA1]/[ACVA] molar ratio of 5 at 25 wt%.  $r_{TEM}$  represents the number-average radius obtained by TEM and  $r_{DLS}$  by DLS.  $M_{n,theo}$  represents the theoretical number-average molecular weight of PMAA-*b*-PS and  $M_{n,theo}^*$  the theoretical number-average molecular weight of PMMA-*b*-PS. The dispersity  $M_w/M_n$  was determined by SEC THF using PS calibration after methylation.

| Time [min] | Conversion [%] | $r_{DLS}$ [nm]   | $PDI$           | $r_{TEM}$ [nm] | $M_{n,theo}$ [kDa] | $M_{n,theo}^*$ [kDa] | $M_{n,exp}$ [kDa] | $M_w/M_n$ |
|------------|----------------|------------------|-----------------|----------------|--------------------|----------------------|-------------------|-----------|
| 50         | 1.8            | -                | -               | -              | 1.09               | 1.10                 | -                 | -         |
| 60         | 7.5            | $26 \pm 1$       | $0.4 \pm 0.2$   | -              | 3.84               | 3.89                 | -                 | -         |
| 70         | 34             | $28.88 \pm 0.06$ | $0.09 \pm 0.02$ | -              | 15.9               | 16.2                 | 27.3              | 1.35      |
| 80         | 67             | $30.6 \pm 0.3$   | $0.07 \pm 0.02$ | $24 \pm 2$     | 31.1               | 31.5                 | 51.7              | 1.35      |
| 90         | 86             | $32.5 \pm 0.6$   | $0.08 \pm 0.03$ | -              | 39.8               | 40.4                 | 70.8              | 1.40      |
| 120        | 94             | $33.1 \pm 0.3$   | $0.04 \pm 0.01$ | $29 \pm 3$     | 43.6               | 44.2                 | 71.0              | 1.50      |

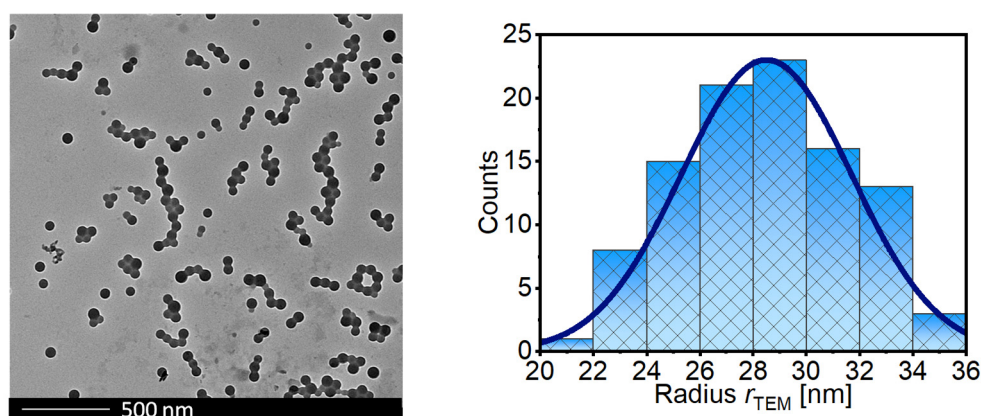

**Figure S2.** TEM image (left) and histogram (right) of the number-average radius of the PMAA<sub>10</sub>-b-PS<sub>90</sub><sup>45</sup> with CTA1 copolymer and 25 wt% after 120 minutes reaction time.

**Table S6.** Kinetic Data of the Polymerization of PMAA<sub>10</sub>-*b*-PS<sub>90</sub><sup>45</sup> with CTA1 at 80 °C in water and a targeted MAA DP of 50 and a styrene DP of 400 with a [CTA1]/[ACVA] molar ratio of 5 at 30 wt%.  $r_{TEM}$  represents the number-average radius obtained by TEM and  $r_{DLS}$  by DLS.  $M_{n,theo}$  represents the theoretical number-average molecular weight of PMAA-*b*-PS and  $M_{n,theo}^*$  the theoretical number-average molecular weight of PMMA-*b*-PS. The dispersity  $M_w/M_n$  was determined by SEC THF using PS calibration after methylation.

| Time [min] | Conversion [%] | $r_{DLS}$ [nm] | PDI         | $r_{TEM}$ [nm] | $M_{n,theo}$ [kDa] | $M_{n,theo}^*$ [kDa] | $M_{n,exp}$ [kDa] | $M_w/M_n$ |
|------------|----------------|----------------|-------------|----------------|--------------------|----------------------|-------------------|-----------|
| 180        | 6.9            | -              | -           | -              | 3.44               | 3.49                 | -                 | -         |
| 240        | 18             | -              | -           | -              | 8.38               | 8.50                 | -                 | -         |
| 300        | 28             | 42.1 ± 0.3     | 0.56 ± 0.04 | 26 ± 2         | 13.0               | 13.2                 | 26.0              | 1.38      |

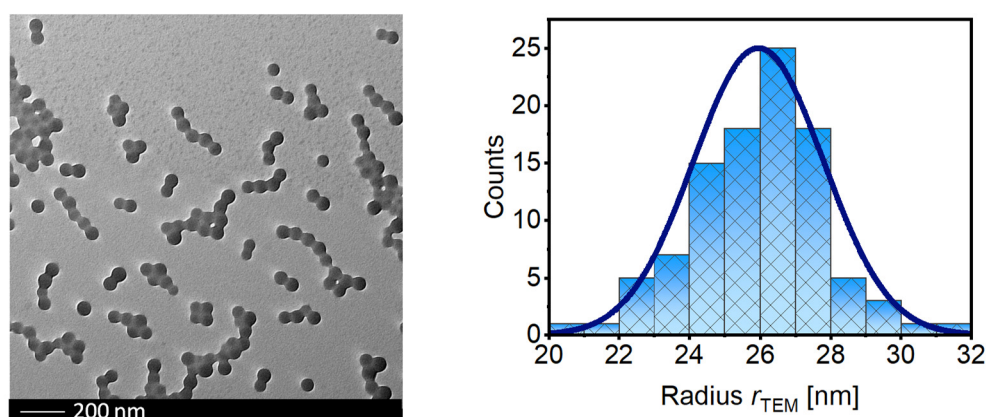

**Figure S3.** TEM image (left) and histogram (right) of the number-average radius of the PMAA<sub>10</sub>-*b*-PS<sub>90</sub><sup>45</sup> with CTA1 copolymer and 30 wt% after 300 minutes reaction time.

**Table S7.** Polymerization of PMAA<sub>20</sub>-*b*-PS<sub>80</sub><sup>18</sup> with CTA3 at 80 °C in water and a targeted styrene DP of 200 with a [CTA3]/[ACVA] molar ratio of 5.  $r_{TEM}$  represents the number-average radius obtained by TEM and  $r_{DLS}$  by DLS.  $M_{n,theo}$  represents the theoretical number-average molecular weight of PMAA-*b*-PS. The dispersity  $M_w/M_n$  was determined by SEC THF + 35 mmol TFA using universal PS calibration. The PMAA-CTA3 macro-CTA was synthesized in ethanol and determined with NMR and aqueous SEC using PEO calibration with  $M_{n,theo}$  = 3.8 kDa and a  $M_w/M_n$  = 1.11.

| (w/w) solids [%] | Time [min] | Conversion [%] | $r_{TEM}$ [nm] | $r_{DLS}$ [nm] | PDI         | $M_{n,theo}$ [kDa] | $M_{n,exp}$ [kDa] | $M_w/M_n$ |
|------------------|------------|----------------|----------------|----------------|-------------|--------------------|-------------------|-----------|
| 40               | 10         | 0              | -              | -              | -           | 3.8                | -                 | -         |
| 40               | 20         | 0              | -              | -              | -           | 3.8                | -                 | -         |
| 40               | 30         | 6.5            | -              | 36.0 ± 0.5     | 0.15 ± 0.06 | 4.8                | -                 | -         |
| 40               | 40         | 24             | -              | 40.2 ± 0.4     | 0.03 ± 0.02 | 7.4                | -                 | -         |
| 40               | 50         | 45             | -              | 44.6 ± 0.1     | 0.07 ± 0.01 | 10                 | 35                | 1.17      |
| 40               | 60         | 65             | -              | 48.2 ± 0.5     | 0.05 ± 0.05 | 13                 | 46                | 1.20      |
| 40               | 70         | 78             | -              | 49.6 ± 0.4     | 0.02 ± 0.02 | 15                 | 53                | 1.20      |
| 40               | 80         | 91             | 45 ± 3         | 51.8 ± 0.6     | 0.05 ± 0.02 | 17                 | 59                | 1.23      |
| 50               | 10         | 0              | -              | -              | -           | 3.8                | -                 | -         |
| 50               | 20         | 0              | -              | -              | -           | 3.8                | -                 | -         |
| 50               | 30         | 9.4            | -              | 34.9 ± 0.5     | 0.14 ± 0.09 | 5.3                | -                 | -         |
| 50               | 40         | 40             | -              | 38.9 ± 2.5     | 0.21 ± 0.23 | 9.7                | 35                | 1.18      |
| 50               | 50         | 63             | -              | 44.6 ± 0.3     | 0.06 ± 0.05 | 13                 | 46                | 1.18      |
| 50               | 60         | 77             | -              | 47.2 ± 0.6     | 0.03 ± 0.02 | 15                 | 55                | 1.20      |
| 50               | 70         | 92             | -              | 48.7 ± 0.6     | 0.04 ± 0.03 | 17                 | 62                | 1.21      |
| 50               | 80         | 94             | 41 ± 2         | 50 ± 1         | 0.06 ± 0.05 | 18                 | 63                | 1.23      |

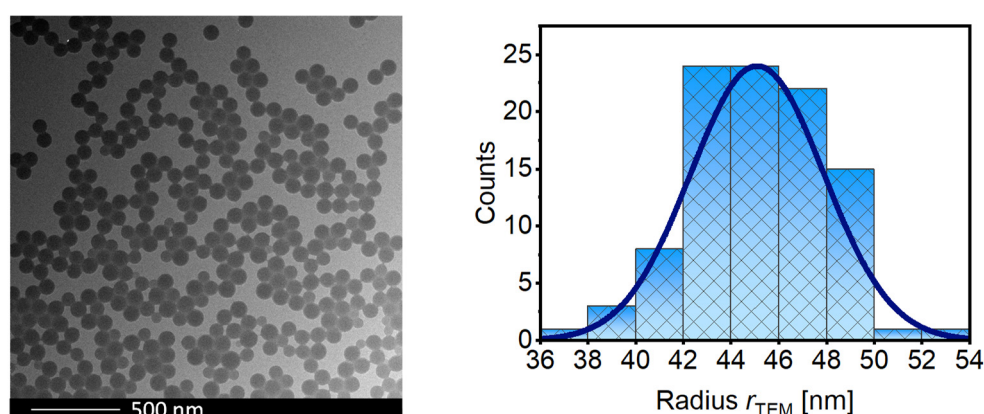

**Figure S4.** TEM image (left) and histogram (right) of the number-average radius of the PMAA<sub>20</sub>-*b*-PS<sub>80</sub><sup>18</sup> with CTA3 copolymer and 40 wt%.

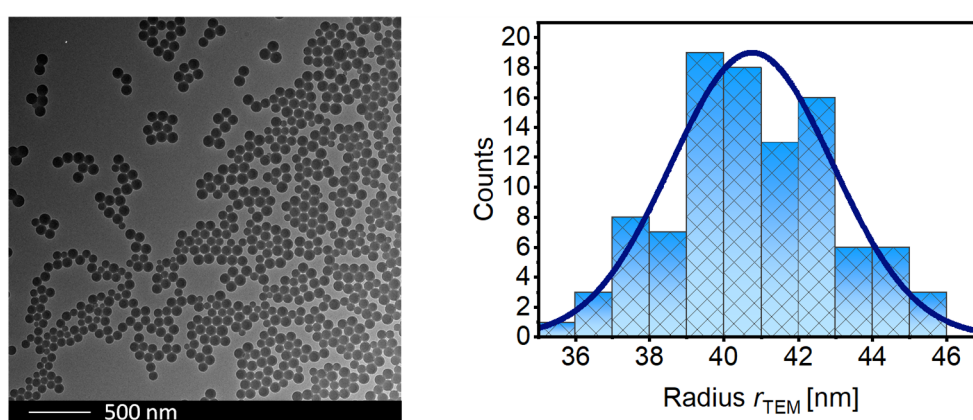

**Figure S5.** TEM image (left) and histogram (right) of the number-average radius of the PMAA<sub>20</sub>-*b*-PS<sub>80</sub><sup>18</sup> with CTA3 copolymer and 50 wt%.

**Table S8.** Kinetic Data of the Polymerization of PMAA<sub>20</sub>-*b*-PS<sub>80</sub><sup>42</sup> with CTA3 at 80 °C in water with a targeted styrene DP of 320 with a [CTA3]/[ACVA] molar ratio of 5 at 50 wt%.  $r_{\text{TEM}}$  represents the number-average radius obtained by TEM and  $r_{\text{DLS}}$  by DLS.  $M_{\text{n,theo}}$  represents the theoretical number-average molecular weight of PMAA-*b*-PS and  $M_{\text{n,theo}}^*$  the theoretical number-average molecular weight of PMMA-*b*-PS. The dispersity  $M_{\text{w}}/M_{\text{n}}$  was determined by SEC THF + 35 mmol TFA using universal PS calibration. The PMAA-CTA3 macro-CTA was synthesized in 1-propanol and determined with NMR and aqueous SEC using PEO calibration with  $M_{\text{n,theo}} = 8.5$  kDa and a  $M_{\text{w}}/M_{\text{n}} = 1.09$ .

| Time [min] | Conversion [%] | $r_{\text{DLS}}$ [nm] | <i>PDI</i>  | $r_{\text{TEM}}$ [nm] | $M_{\text{n,theo}}$ [kDa] | $M_{\text{n,exp}}$ [kDa] | $M_{\text{w}}/M_{\text{n}}$ |
|------------|----------------|-----------------------|-------------|-----------------------|---------------------------|--------------------------|-----------------------------|
| 20         | 0              | -                     | -           | -                     | -                         | -                        | -                           |
| 40         | 2.2            | 41.1 ± 0.7            | 0.55 ± 0.05 | -                     | 9.2                       | -                        | -                           |
| 60         | 32             | 48 ± 1                | 0.06 ± 0.04 | 32 ± 3                | 19                        | 27.6                     | 1.16                        |
| 80         | 74             | 53.2 ± 0.8            | 0.05 ± 0.03 | 42 ± 4                | 33                        | 50.3                     | 1.20                        |
| 100        | 95             | 57 ± 1                | 0.05 ± 0.05 | 42 ± 4                | 40                        | 58.9                     | 1.21                        |
| 120        | 98             | 58 ± 1                | 0.02 ± 0.02 | -                     | 41                        | 59.2                     | 1.22                        |
| 140        | 98             | 56.2 ± 0.8            | 0.05 ± 0.02 | -                     | 41                        | 59.6                     | 1.22                        |



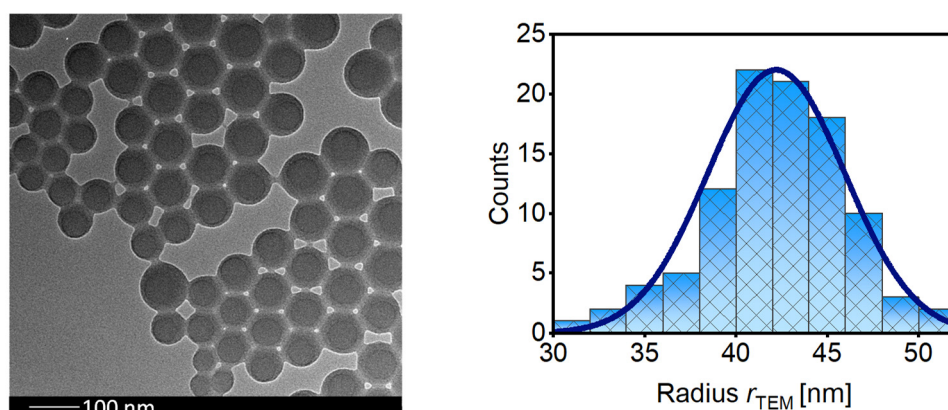

**Figure S6.** TEM image (left) and histogram (right) of the number-average radius of the of PMAA<sub>20</sub>-*b*-PS<sub>80</sub><sup>42</sup> after 100 minutes reaction time with CTA3 copolymer and 50 wt% and 80 % weight fraction of styrene.

**Table S9.** Kinetic Data of the Polymerization of PMAA<sub>10</sub>-*b*-PS<sub>90</sub><sup>86</sup> with CTA3 at 80 °C in water with a targeted styrene DP of 740 with a [CTA3]/[ACVA] molar ratio of 5 at 50 wt%.  $r_{TEM}$  represents the number-average radius obtained by TEM and  $r_{DLS}$  by DLS.  $M_{n,theo}$  represents the theoretical number-average molecular weight of PMAA-*b*-PS and  $M_{n,theo}^*$  the theoretical number-average molecular weight of PMMA-*b*-PS. The dispersity  $M_w/M_n$  was determined by SEC THF + 35 mmol TFA using universal PS calibration. The PMAA-CTA3 macro-CTA was synthesized in 1-propanol and determined with NMR and aqueous SEC using PEO calibration with  $M_{n,theo} = 8.5$  kDa and a  $M_w/M_n = 1.09$ .

| Time [min] | Conversion [%] | $r_{DLS}$ [nm] | <i>PDI</i>  | $r_{TEM}$ [nm] | $M_{n,theo}$ [kDa] | $M_{n,exp}$ [kDa] | $M_w/M_n$ |
|------------|----------------|----------------|-------------|----------------|--------------------|-------------------|-----------|
| 20         | 0              | -              | -           | -              | -                  | -                 | -         |
| 40         | 0              | -              | -           | -              | -                  | -                 | -         |
| 60         | 2.0            | -              | -           | -              | 10                 | -                 | -         |
| 80         | 5.1            | 50.1 ± 0.5     | 0.07 ± 0.02 | -              | 12                 | 10.2              | 2.63      |
| 120        | 22             | 59.2 ± 0.5     | 0.04 ± 0.02 | 39 ± 4         | 26                 | 41.9              | 1.27      |
| 145        | 38             | 62.7 ± 0.5     | 0.03 ± 0.03 | 52 ± 6         | 38                 | 57.7              | 1.32      |
| 160        | 45             | 65.3 ± 0.8     | 0.07 ± 0.02 | 55 ± 4         | 43                 | 69.9              | 1.40      |
| 180        | 60             | 69.6 ± 0.2     | 0.1 ± 0.1   | 60 ± 5         | 55                 | 91.4              | 1.43      |

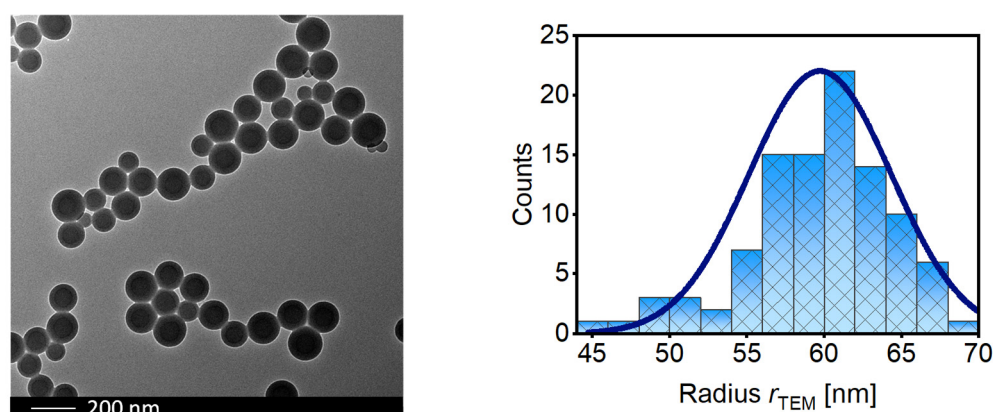

**Figure S7.** TEM image (left) and histogram (right) of the number-average radius of the of PMAA<sub>10</sub>-*b*-PS<sub>90</sub><sup>86</sup> after 180 minutes reaction time with CTA3 copolymer and 50 wt% and 90 % weight fraction of styrene.



**Table S10.** Kinetic Data of the Polymerization of PMAA<sub>5</sub>-*b*-PS<sub>95</sub><sup>165</sup> with CTA3 at 80 °C in water with a targeted styrene DP of 1500 with a [CTA3]/[ACVA] molar ratio of 5 at 50 wt%.  $r_{TEM}$  represents the number-average radius obtained by TEM and  $r_{DLS}$  by DLS.  $M_{n,theo}$  represents the theoretical number-average molecular weight of PMAA-*b*-PS and  $M_{n,theo}^*$  the theoretical number-average molecular weight of PMMA-*b*-PS. The dispersity  $M_w/M_n$  was determined by SEC THF + 35 mmol TFA using universal PS calibration. The PMAA-CTA3 macro-CTA was synthesized in 1-propanol and determined with NMR and aqueous SEC using PEO calibration with  $M_{n,theo} = 8.5$  kDa and a  $M_w/M_n = 1.09$ .

| Time [min] | Conversion [%] | $r_{DLS}$ [nm] | $PDI$           | $r_{TEM}$ [nm] | $M_{n,theo}$ [kDa] | $M_{n,exp}$ [kDa] | $M_w/M_n$ |
|------------|----------------|----------------|-----------------|----------------|--------------------|-------------------|-----------|
| 20         | 0              | -              | -               | -              | -                  | -                 | -         |
| 40         | 0              | -              | -               | -              | -                  | -                 | -         |
| 60         | 0              | -              | -               | -              | -                  | -                 | -         |
| 80         | 1              | -              | -               | -              | 10                 | -                 | -         |
| 100        | 3              | $58.4 \pm 0.1$ | $0.07 \pm 0.02$ | -              | 14                 | 34.1              | 1.15      |
| 120        | 6.9            | $61.1 \pm 0.7$ | $0.06 \pm 0.02$ | -              | 19                 | 37.1              | 1.24      |
| 140        | 8.9            | $64.6 \pm 0.8$ | $0.06 \pm 0.05$ | -              | 22                 | 43.5              | 1.28      |
| 160        | 11             | $66.7 \pm 0.5$ | $0.06 \pm 0.02$ | -              | 26                 | 45.1              | 1.30      |
| 180        | 13             | $69.5 \pm 0.4$ | $0.06 \pm 0.02$ | $55 \pm 7$     | 28                 | 45.7              | 1.40      |

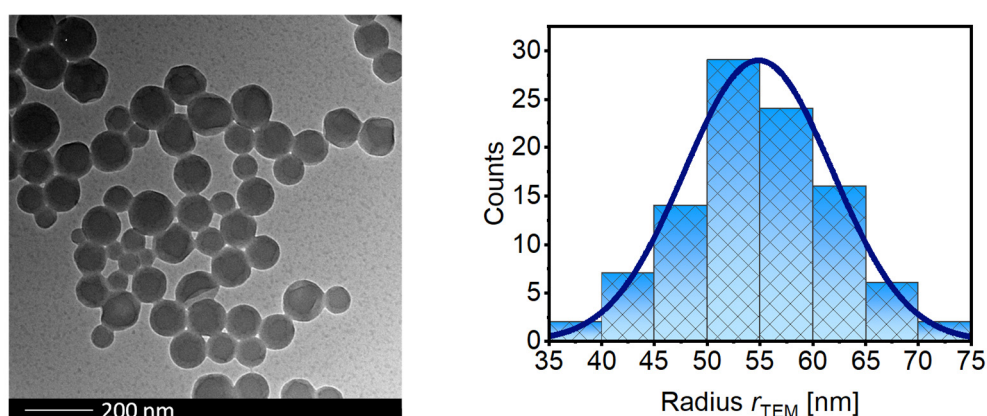

**Figure S8.** TEM image (left) and histogram (right) of the number-average radius of the of PMAA<sub>5</sub>-*b*-PS<sub>95</sub><sup>165</sup> after 180 minutes reaction time with CTA3 copolymer and 50 wt% and 90 % weight fraction of styrene.

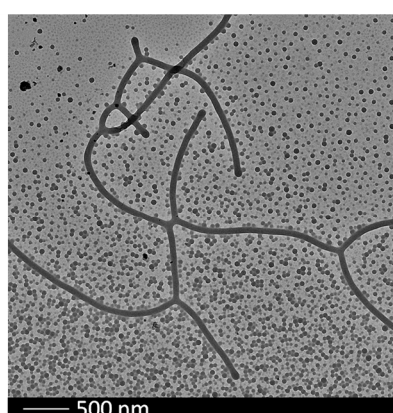

**Figure S9.** TEM image of PMAA<sub>40</sub>-*b*-PS<sub>60</sub><sup>46</sup> after full conversion with CTA1 copolymer and 20 wt%.

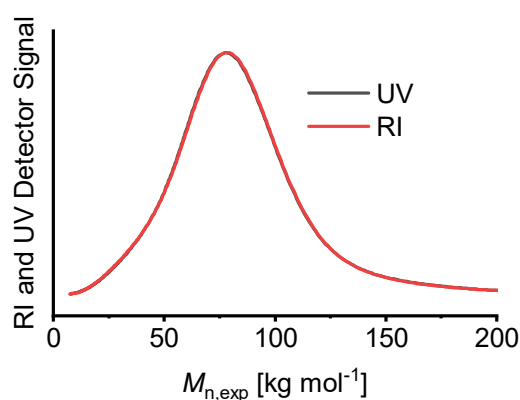

Figure S10. SEC results of PMAA<sub>20</sub>-*b*-PS<sub>80</sub><sup>42</sup> with CTA3 at 50 wt% after full conversion.

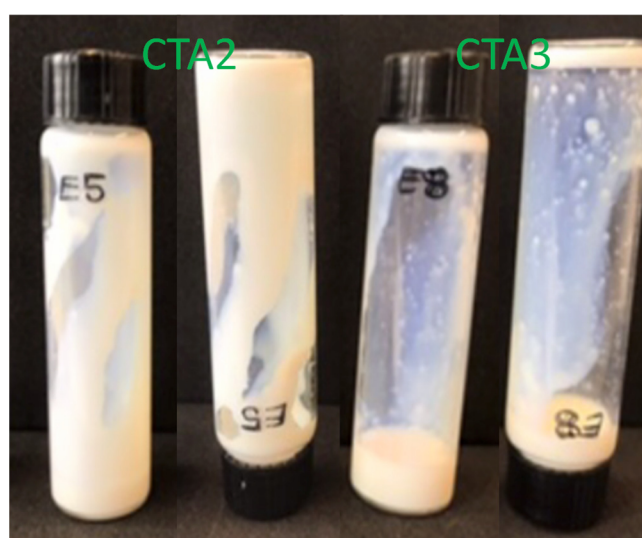

Figure S11. Pictures of the polymerization of PMAA-*b*-PS with CTA2 and CTA3 at 40 wt%. The polymerization with CTA2 shows clearly a more viscous medium.

Table S11. Overview of the PMAA-*b*-PS polymerizations with the corresponding macro-CTAs. SEC data for macro-CTA1 for polymer PMAA<sub>10</sub>-*b*-PS<sub>90</sub><sup>45</sup> was determined with aqueous SEC using PAA calibration. All other macro-CTAs were measured against PEO calibration as it was mentioned in the previous tables. For more detailed information see Table S3-S10.

| Targeted polymer                                               | Time [min] | (w/w) solids [%] | Macro-CTA | DP PMAA | $M_{n,theo}$ PMAA [kDa] | $M_n, M_w$ PMAA | Targeted DP PS | Targeted PS $M_{n,theo}$ [kDa] | PS Conversion | $M_{n,exp}$ PMAA- <i>b</i> -PS [kDa] | $M_n, M_w$ PMAA- <i>b</i> -PS |
|----------------------------------------------------------------|------------|------------------|-----------|---------|-------------------------|-----------------|----------------|--------------------------------|---------------|--------------------------------------|-------------------------------|
| PMAA <sub>05</sub> - <i>b</i> -PS <sub>95</sub> <sup>54</sup>  | 120        | 20               | CTA1      | 30      | 2.9                     | 1.06            | 502            | 52.3                           | 99            | 69.1                                 | 1.33                          |
| PMAA <sub>10</sub> - <i>b</i> -PS <sub>90</sub> <sup>45</sup>  | 120        | 20               | CTA1      | 50      | 4.5                     | 1.25            | 400            | 41.7                           | 97            | 69.5                                 | 1.26                          |
| PMAA <sub>10</sub> - <i>b</i> -PS <sub>90</sub> <sup>45</sup>  | 120        | 25               | CTA1      | 50      | 4.5                     | 1.25            | 400            | 41.7                           | 94            | 71.0                                 | 1.50                          |
| PMAA <sub>10</sub> - <i>b</i> -PS <sub>90</sub> <sup>45</sup>  | 300        | 30               | CTA1      | 50      | 4.5                     | 1.25            | 400            | 41.7                           | 28            | 26.0                                 | 1.38                          |
| PMAA <sub>20</sub> - <i>b</i> -PS <sub>80</sub> <sup>46</sup>  | 240        | 35               | CTA2      | 101     | 8.7                     | 1.17            | 360            | 37.4                           | 99            | 166                                  | 1.57                          |
| PMAA <sub>20</sub> - <i>b</i> -PS <sub>80</sub> <sup>46</sup>  | 240        | 40               | CTA2      | 101     | 8.7                     | 1.17            | 360            | 37.4                           | 99            | 158                                  | 1.61                          |
| PMAA <sub>20</sub> - <i>b</i> -PS <sub>80</sub> <sup>18</sup>  | 80         | 40               | CTA3      | 43      | 3.8                     | 1.11            | 140            | 33.2                           | 91            | 59.0                                 | 1.23                          |
| PMAA <sub>20</sub> - <i>b</i> -PS <sub>80</sub> <sup>18</sup>  | 80         | 50               | CTA3      | 43      | 3.8                     | 1.11            | 140            | 33.2                           | 94            | 63.0                                 | 1.23                          |
| PMAA <sub>20</sub> - <i>b</i> -PS <sub>80</sub> <sup>42</sup>  | 140        | 50               | CTA3      | 95      | 8.5                     | 1.09            | 320            | 33.2                           | 99            | 59.6                                 | 1.22                          |
| PMAA <sub>10</sub> - <i>b</i> -PS <sub>90</sub> <sup>86</sup>  | 180        | 50               | CTA3      | 95      | 8.5                     | 1.09            | 740            | 77.0                           | 60            | 91.4                                 | 1.43                          |
| PMAA <sub>05</sub> - <i>b</i> -PS <sub>95</sub> <sup>165</sup> | 180        | 50               | CTA3      | 95      | 8.5                     | 1.09            | 1500           | 156                            | 13            | 45.7                                 | 1.40                          |
